# Supplementary material for: Explicit-pH Coarse-Grained Molecular Dynamics Simulations Enable Insights into Restructuring of Intestinal Colloidal Aggregates with Permeation Enhancers
Source: MDPI journal article supplement (doi:10.3390/pr10010029), 2021-12-24
Supplement: s1 [file s1]

Supplementary Material

# Explicit-pH Coarse-Grained Molecular Dynamics Simulations Enable Insights into Restructuring of Intestinal Colloidal Aggregates with Permeation Enhancers

Shakhawath Hossain, Albin Parrow, Aleksei Kabedev, Rosita Carolina Kneiszl, Yuning Leng and Per Larsson \*

Department of Pharmacy and the Swedish Drug Delivery Center (SweDeliver), Uppsala University, Husargatan 3, 751 23 Uppsala, Sweden; shakhawath.hossain@farmaci.uu.se (S.H.); albin.parrow@farmaci.uu.se (A.P.); aleksei.kabedev@farmaci.uu.se (A.K.); rosita.kneiszl@farmaci.uu.se (R.C.K.); lengyuning@outlook.com (Y.L.)

\* Correspondence: per.r.larsson@uu.se; Tel.: +46-18-471-5396

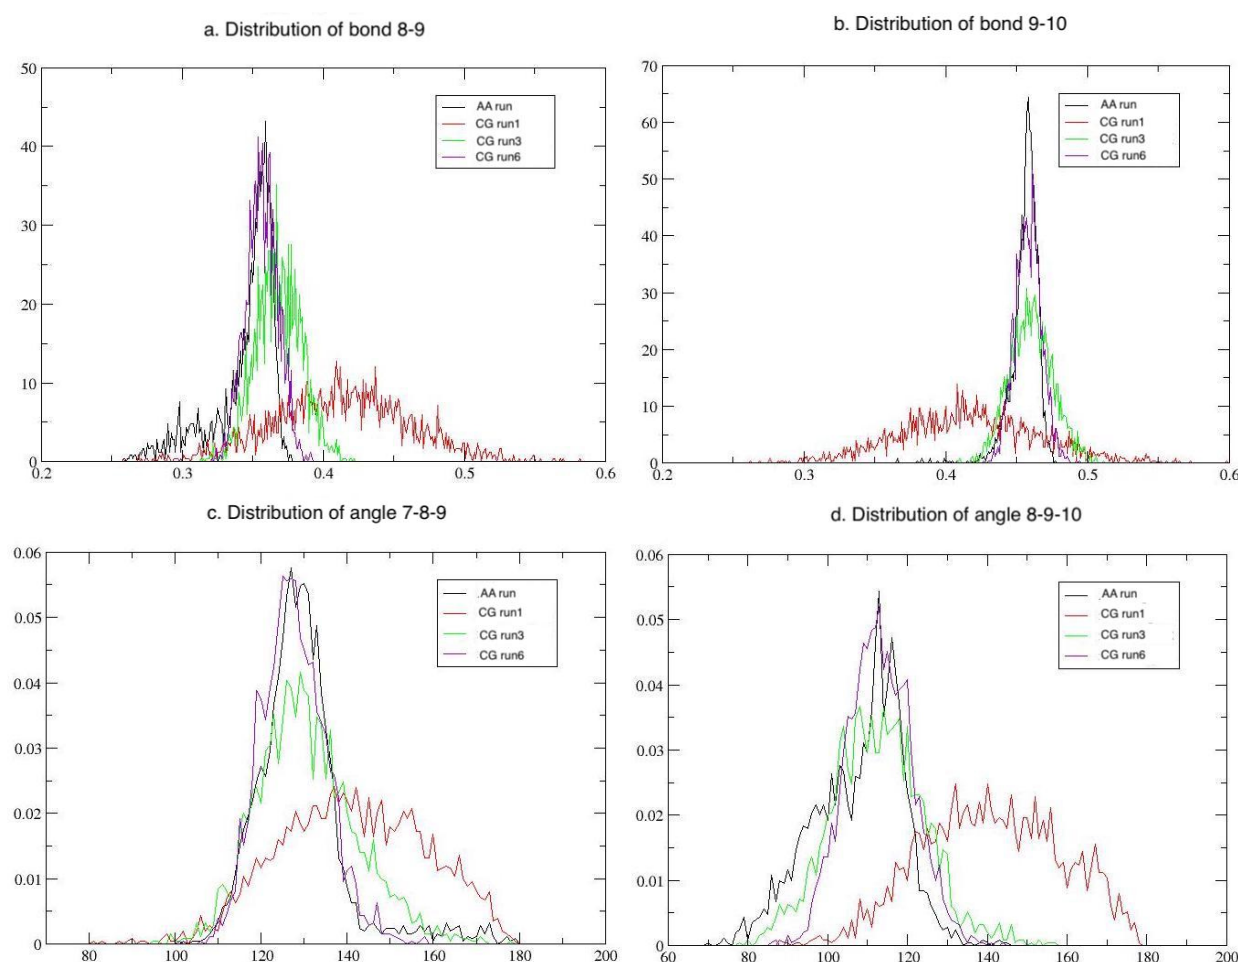

**Figure S1.** Histograms of AA and CG bond lengths and angles for **a)** bond 8-9, **b)** bond 9-10, **c)** angle 7-8-9, and **d)** angle 8-9-10 for a different CG-optimization runs (1, 3 and 6). Black line is the reference AA distributions, CG run 1 is the red line, CG run 3 is the green line, and CG run 6 is colored in violet in all plots. Figures generated by XMGRACE.

## Solvent Accessible Surface

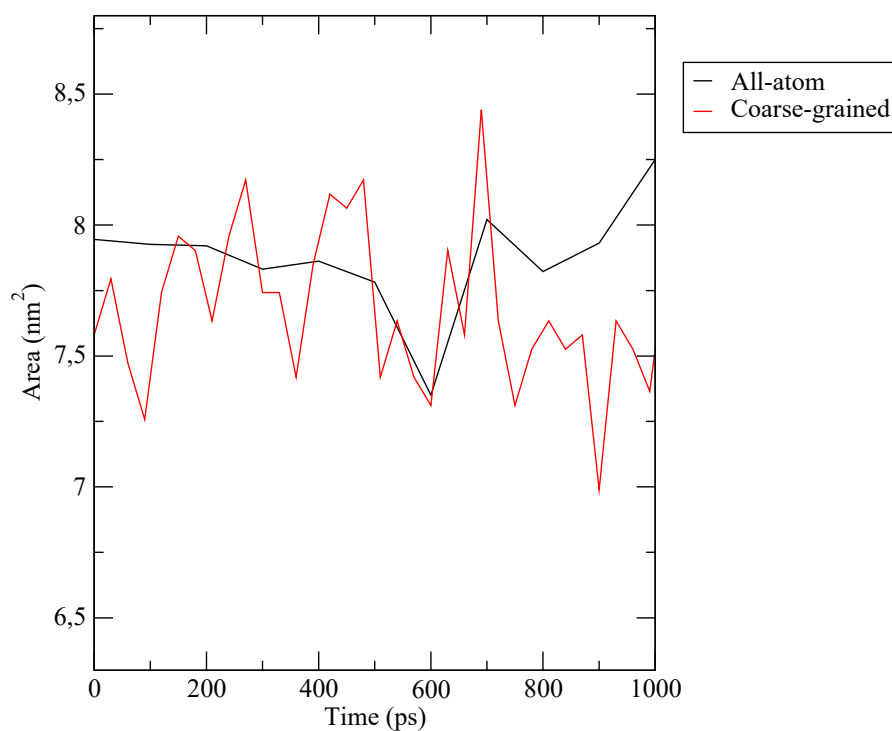

**Figure S2.** Time-evolution of solvent accessible surface area for the reference all-atom and coarse-grained versions of taurocholate. The coarse-grained simulation was sampled more frequently as part of the parametrization process Figure generated by XMGRACE.

**Table S1.** Different Non-Bonded Interaction Parameters with Neutral Beads for the taurocholate titratable beads which is defined as SP6\_2.0.

| Titratable Taurocholate Bead | Neutral Beads | $\sigma$ | $\epsilon$ |
|------------------------------|---------------|----------|------------|
| SP6_2.0                      | C1            | 0.473    | 1.28       |
| SP6_2.0                      | C4            | 0.430    | 1.93       |
| SP6_2.0                      | C4h           | 0.430    | 1.93       |
| SP6_2.0                      | X2            | 0.430    | 2.32       |
| SP6_2.0                      | N4a           | 0.430    | 2.92       |
| SP6_2.0                      | SN4a          | 0.410    | 2.35       |
| SP6_2.0                      | SC3           | 0.418    | 1.40       |
| SP6_2.0                      | SC2           | 0.418    | 1.40       |
| SP6_2.0                      | SX2           | 0.410    | 1.91       |
| SP6_2.0                      | TN3d          | 0.365    | 1.75       |
| SP6_2.0                      | TC5           | 0.394    | 1.29       |
| SP6_2.0                      | TC4           | 0.404    | 1.13       |
| SP6_2.0                      | TC2           | 0.409    | 1.08       |
| SP6_2.0                      | SC6           | 0.410    | 1.91       |
| SP6_2.0                      | SC5           | 0.410    | 1.75       |
| SP6_2.0                      | P3            | 0.430    | 3.97       |
| SP6_2.0                      | SN6           | 0.410    | 2.84       |
| SP6_2.0                      | SP1           | 0.410    | 3.55       |
| SP6_2.0                      | SP3           | 0.410    | 3.55       |

**Table S2.** pH dependent interaction parameters with water for the taurocholate titratable bead SP6\_2.0.

| pH   | Titratable taurocholate bead | Water bead | $\sigma$ | $\epsilon$ |
|------|------------------------------|------------|----------|------------|
| 3.00 | SP6_2.0                      | WNT        | 0.425    | 1.00       |
| 3.25 | SP6_2.0                      | WNT        | 0.425    | 3.25       |
| 3.50 | SP6_2.0                      | WNT        | 0.425    | 4.50       |
| 4.00 | SP6_2.0                      | WNT        | 0.425    | 5.75       |
| 4.25 | SP6_2.0                      | WNT        | 0.425    | 7.00       |
| 4.50 | SP6_2.0                      | WNT        | 0.425    | 10.00      |
| 4.75 | SP6_2.0                      | WNT        | 0.425    | 13.00      |
| 5.00 | SP6_2.0                      | WNT        | 0.425    | 16.00      |
| 5.25 | SP6_2.0                      | WNT        | 0.425    | 19.00      |
| 5.50 | SP6_2.0                      | WNT        | 0.425    | 21.00      |
| 5.75 | SP6_2.0                      | WNT        | 0.425    | 22.00      |
| 6.00 | SP6_2.0                      | WNT        | 0.425    | 23.00      |
| 6.25 | SP6_2.0                      | WNT        | 0.425    | 23.00      |
| 6.75 | SP6_2.0                      | WNT        | 0.425    | 23.00      |
| 7.00 | SP6_2.0                      | WNT        | 0.425    | 23.00      |
| 7.25 | SP6_2.0                      | WNT        | 0.425    | 23.00      |
| 7.50 | SP6_2.0                      | WNT        | 0.425    | 23.00      |
| 7.75 | SP6_2.0                      | WNT        | 0.425    | 23.00      |
| 8.00 | SP6_2.0                      | WNT        | 0.425    | 23.00      |

**Table S3.** Other interaction parameters for the taurocholate titratable bead SP6\_2.0

| Interaction Parameters with Proton of the Titratable Model     |                       |          |            |
|----------------------------------------------------------------|-----------------------|----------|------------|
| Titratable Taurocholate Bead                                   | Proton Beads          | $\sigma$ | $\epsilon$ |
| SP6_2.0                                                        | POS                   | 0.295    | 1.00       |
| Self-Interaction Parameters                                    |                       |          |            |
| Titratable Taurocholate Bead                                   | Proton Beads          | $\sigma$ | $\epsilon$ |
| SP6_2.0                                                        | SP6_2.0               | 0.410    | 1.00       |
| Non-Bonded Interaction Parameters with Charged Beads           |                       |          |            |
| Titratable Taurocholate Bead                                   | Charged Beads         | $\sigma$ | $\epsilon$ |
| SP6_2.0                                                        | Q1p                   | 0.430    | 2.40       |
| SP6_2.0                                                        | Q5n                   | 0.430    | 2.80       |
| Non-Bonded Interaction Parameters With Another Titratable Bead |                       |          |            |
| Titratable Taurocholate Bead                                   | Titratable Acid Beads | $\sigma$ | $\epsilon$ |
| SP6_2.0                                                        | P2_4.8                | 0.430    | 1.00       |

**Table S4.** List of the simulated systems and the number of the all the molecules inserted into the simulation box.

| System Number | Description                        | Number of Different Molecules used in the Simulations |
|---------------|------------------------------------|-------------------------------------------------------|
| 1             | FaSSIF with 20 mM caprate at pH 3  | Water—129408, taurocholate—28,                        |
| 2             | FaSSIF with 20 mM caprate at pH 5  | DLiPC—7, caprate—188, sodium ion—                     |
| 3             | FaSSIF with 20 mM caprate at pH 8  | 216                                                   |
| 4             | FeSSIF with 20 mM caprate at pH 3  | Water—129408, taurocholate—141,                       |
| 5             | FeSSIF with 20 mM caprate at pH 5  | DLiPC—35, caprate—188, sodium ion—                    |
| 6             | FeSSIF with 20 mM caprate at pH 8  | 329                                                   |
| 7             | FaSSIF with 20 mM SNAC at pH 3     | Water—129408, taurocholate—28,                        |
| 8             | FaSSIF with 20 mM SNAC at pH 5     | DLiPC—7, SNAC—188, sodium ion—                        |
| 9             | FaSSIF with 20 mM SNAC at pH 8     | 216                                                   |
| 10            | FeSSIF with 20 mM SNAC at pH 3     | Water—129408, taurocholate—141,                       |
| 11            | FeSSIF with 20 mM SNAC at pH 5     | DLiPC—35, SNAC—188, sodium ion—                       |
| 12            | FeSSIF with 20 mM SNAC at pH 8     | 329                                                   |
| 13            | FaSSIF with 100 mM caprate at pH 3 | Water—129408, taurocholate—28,                        |
| 14            | FaSSIF with 100 mM caprate at pH 5 | DLiPC—7, caprate—940, sodium ion—                     |
| 15            | FaSSIF with 100 mM caprate at pH 8 | 968                                                   |
| 16            | FeSSIF with 100 mM caprate at pH 3 | Water—129408, taurocholate—141,                       |
| 17            | FeSSIF with 100 mM caprate at pH 5 | DLiPC—35, caprate—940, sodium ion—                    |
| 18            | FeSSIF with 100 mM caprate at pH 8 | 1081                                                  |
| 19            | FaSSIF with 100 mM SNAC at pH 3    | Water—129408, taurocholate—28,                        |
| 20            | FaSSIF with 100 mM SNAC at pH 5    | DLiPC—7, SNAC—940, sodium ion—                        |
| 21            | FaSSIF with 100 mM SNAC at pH 8    | 968                                                   |
| 22            | FeSSIF with 100 mM SNAC at pH 3    | Water—129408, taurocholate—141,                       |
| 23            | FeSSIF with 100 mM SNAC at pH 5    | DLiPC—35, SNAC—940, sodium ion—                       |
| 24            | FeSSIF with 100 mM SNAC at pH 8    | 1081                                                  |
